# Supplementary material
Source: publisher figshare collection journal article supplement (https://springernature.figshare.com/ndownloader/files/22644989)
Supplement: Supplementary file 1 [file 22644989]

## Sheet: Sheet1
Age	Size (cm)	Review diagnosis	Ki-67 (%)	B-cat (%)	p53 (%)	E-cad (%)	Recur	Month	Survival	Month
57	4	Low-grade Phyllodes tumor	2	30	10	0	0	30	0
43	1.8	Low-grade Phyllodes tumor	10	60	3	0	0	131	0
50	6	Low-grade Phyllodes tumor	8	90	5	0	0	82	0
49	3.5	Low-grade Phyllodes tumor	6	20	3	0	0	84	0
35	3.5	Low-grade Phyllodes tumor	6	80	2	0	0	83	0
35	7	Low-grade Phyllodes tumor	2	50	2	0	1	87	0
18	3.9	Low-grade Phyllodes tumor	5	60	3	0	0	0.1	0
30	4.9	Low-grade Phyllodes tumor	5	60	2	0	0	34	0
42	2.8	Low-grade Phyllodes tumor	15	60	20	0	0	44	0
45	2	Low-grade Phyllodes tumor	3	30	10	0	0	78	0
16	2.7	Low-grade Phyllodes tumor	3	60	2	0	0	81	0
22	4.3	Low-grade Phyllodes tumor	6	80	60	0	0	1	0
53	4.5	Low-grade Phyllodes tumor arising associated with fibroadenoma	10	70	2	0	0	60	0
21	2.3	Low-grade Phyllodes tumor	4	20	1	0	0	6	0
27	0.8	Low-grade Phyllodes tumor	1	10	1	0	0	48	0
44	1.3	Low-grade Phyllodes tumor	4	30	40	0	0	61	0
49	1.2	Low-grade Phyllodes tumor	4	70	10	0	0	59	0
22	2.3	Low-grade Phyllodes tumor	8	80	10	0	0	0.1	0
50	2.3	Low-grade Phyllodes tumor	2	2	2	0	0	49	0
45	1.5	Low-grade Phyllodes tumor	8	60	4	0	0	50	0
21	2.5	Low-grade Phyllodes tumor	10	60	2	0	0	0.1	0
14	5.1	Low-grade Phyllodes tumor	15	80	40	0	0	0.1	0
42	2.1	Low-grade Phyllodes tumor	6	50	40	0	0	2	0
41	4.2	Low-grade Phyllodes tumor	30	80	2	0	0	47	0
48	1.5	Low-grade Phyllodes tumor	2	60	4	0	0	46	0
63	1.2	Low-grade Phyllodes tumor	20	20	20	0	0	50	0
27	1	Low-grade Phyllodes tumor	2	60	1	0	0	48	0
39	3.1	Low-grade Phyllodes tumor	2	0	1	0	0	31	0
14	3	Low-grade Phyllodes tumor	10	40	2	0	1	27	0
24	3.6	Low-grade Phyllodes tumor	10	20	2	0	0	24	0
14	3.6	Low-grade Phyllodes tumor	20	20	3	0	0	39	0
30	2	Fibroadenoma	1	50	1	0	0	91	0
17	2.8	Fibroadenoma	1	40	1	0	0	90	0
17	2.3	Fibroadenoma	1	40	1	0	0	83	0
19	2.2	Fibroadenoma	1	50	1	0	0	103	0
25	3	Fibroadenoma	4	70	20	0	0	0.1	0
15	2.2	Fibroadenoma	1	20	1	0	0	46	0
41	1.9	Fibroadenoma	1	20	4	0	0	69	0
15	2	Fibroadenoma	1	20	1	0	0	76	0
32	3	Fibroadenoma	1	50	1	0	0	96	0
24	3	Fibroadenoma	4	10	1	0	0	103	0
38	2	Fibroadenoma	3	5	1	0	0	109	0
18	2	Fibroadenoma	10	80	1	0	0	87	0
31	2.5	Fibroadenoma	2	40	1	0	0	69	0
41	2.6	Fibroadenoma	1	10	1	0	0	101	0
18	1.9	Fibroadenoma	2	40	2	0	0	0.1	0
39	2.2	Fibroadenoma	1	10	1	0	0	1	0
29	4	Fibroadenoma, with sclerosing adenosis	1	0	1	0	0	102	0
49	1.2	Fibroadenoma	2	60	1	0	0	101	0
40	4	Fibroadenoma	3	10	1	0	0	18	0
24	4	Fibroadenoma	1	40	1	0	0	99	0
17	3.2	Fibroadenoma	8	80	1	0	0	0.1	0
24	2.6	Fibroadenoma	2	60	2	0	0	29	0
18	2	Fibroadenoma	2	30	5	0	0	54	0
42	5.1	Fibroadenoma	2	40	1	0	0	53	0
17	2.9	Fibroadenoma	1	80	5	0	0	27	0
30	2.5	Fibroadenoma	2	30	1	0	0	0.1	0
25	4.2	Fibroadenoma	1	20	5	0	0	17	0
17	1.2	Fibroadenoma	3	70	10	0	0	46	0
16	3.2	Fibroadenoma	4	30	5	0	0	53	0
44	2.2	Fibroadenoma	8	40	2	0	0	52	0
61	2.6	High-grade phyllodes tumor with heterologous elements	50	20	100	0	0	16	0
20	4	Phyllodes tumor, with high-grade areas	40	0	20	0	0	24	0
21	4.1	Malignant phyllodes tumor	30	30	2	0	0	89	0
65	7.5	Malignant phyllodes tumor, with fibrosarcoma	50	0	8	0	1	17	1	18
42	15	High grade sarcoma arising in phyllodes tumor	50	0	20	0	1	15	1	19
63	4	Residual phyllodes tumor, high-grade	30	0	5	0	0	50	0
60	30	Malignant phyllodes tumor	20	5	20	0	0	39	0
47	9	High grade pleomorphic liposarcoma	50	40	100	0	0	48	0
66	met	Metastatic phyllodes tumor	70	0	10	0	1	17	1	18
43	met	Recurrent malignant phyllodes tumor	60	0	20	0	1	15	1	19
